# Supplementary material for: Viral Traits and Cellular Knock-Out Genotype Affect Dependence of BVDV on Bovine CD46
Source: MDPI journal article supplement (doi:10.3390/pathogens10121620), 2021-12-14
Supplement: s1 [file s1]

## Supplementary material

Supplementary figure S1:

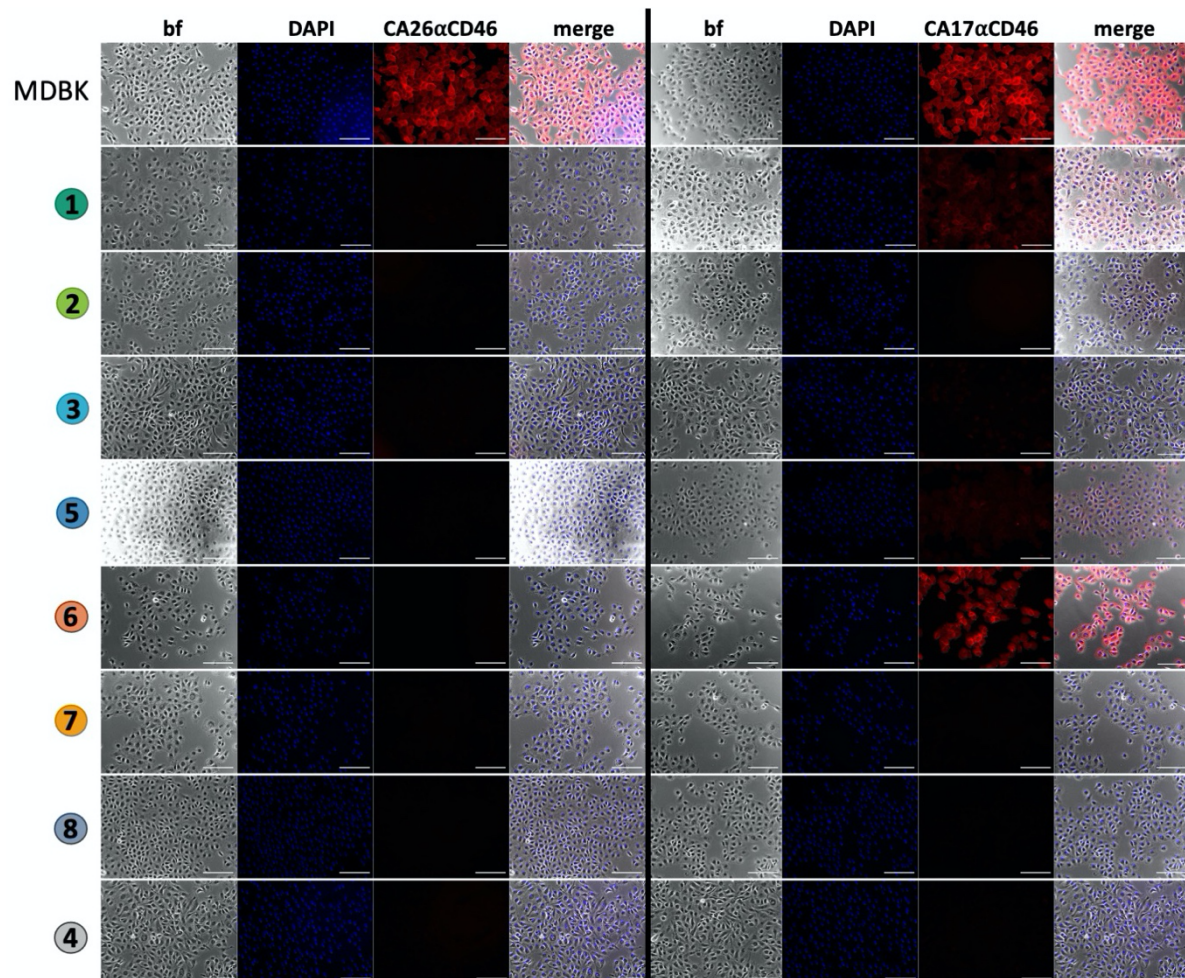

### Interaction of MDBK CD46 knock-out clones with anti-BDVD antibodies CA26 and CA17.

Cells are numbered according to figure 1. Shown are a brightfield image (bf), nuclear staining with DAPI (DAPI), staining with a CD46 interacting antibody (CA26αCD46 [left side] or CA17αCD46 [right side]) and an overlay of the different channels (merge). The scale bar represents 200μm.

## Supplementary figure S2

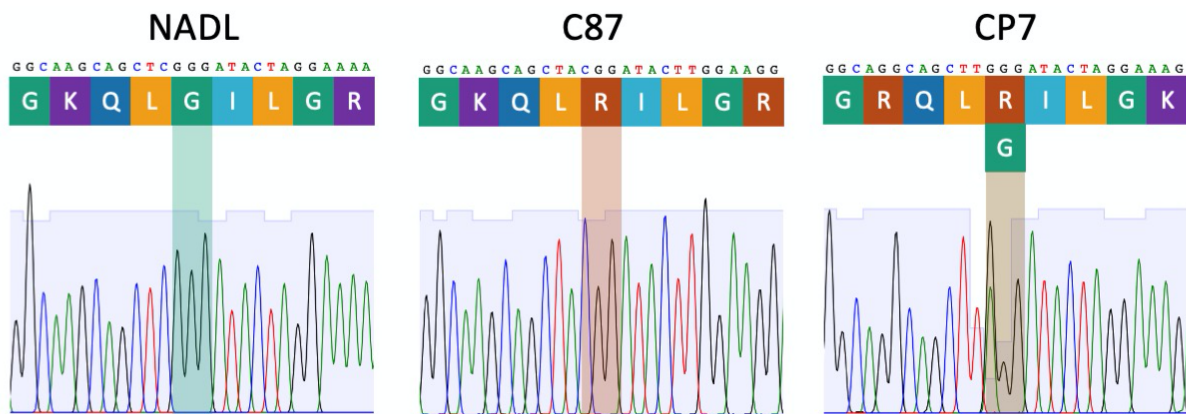

**Presence of a G vs a R residue at amino acid position 479 in the different BVDV strains employed in this study.** Shown are the relevant parts of the sequencing chromatogram of the E<sup>rns</sup> coding region of the virus stocks employed in this study. Please note the nucleotide dimorphism in CP7.
